# Supplementary material
Source: publisher figshare collection journal article supplement (https://springernature.figshare.com/ndownloader/files/17297516)
Supplement: Supplementary file 1 [file 17297516]

## Sheet: READ ME
Complete picklists for each field and a document with guidance text will be prepared prior to metadata extraction and coding (see Evidence Types tab as example). These will be reviewed, clarified, and finalized by all coauthors before metadata extraction and coding begins. All metadata extraction guidance text will be included as Supplemental Material in the final report

## Sheet: Metadata to be collected
	Database Field	Value
ID	ReferenceID	Picklist from EndNote reference list
Relationship*	Bird metric	Picklist generated via text analysis once articles have been screened
	Environment metric	Picklist generated via text analysis once articles have been screened
Study characteristics*	Evidence type	Picklist (Field sampling, remote sensing measurement at exact location, model-based mapping, future projection models, expert opinion or synthesis, quantitative meta analysis)
	Study design type	Picklist (Single site; spatial comparison; temporal comparison; before/after; after impact only; control/treatment (impact); before/after control/impact (BACI).
	SD or SE reported	Yes if SD or SE is reported, No if not
	Is review paper	Yes or no
Bird Species**	Bird species	Picklist from Supplemental file 3. Include all species for which relationship is reported
Location	Study site location type: reported	Step 1- select one hierarchy: Ecoregion, State, County, Property (or simply, LatLong)
	Study site location: reported	Step 2- select the relevant value for the chosen hierarchy
	LongitudeDD	Longitude in decimal degrees
	LatitudeDD	Latitude in decimal degrees
	Lat/long source	Picklist (Lat/long provided in paper, centroid of polygon provided in paper, lat/long intepreted/estimated from text in paper)
*Each unique combination of a relationship and a study is a new record in the database. One study can have >1 record if it reports on >1 relationship
**List each species for which relationship data is reported for each relationship * study combination

## Sheet: Evidence Types
Evidence Types
The objective of this systematic map is to identify primary research studies that provide empirical evidence for forest bird species-environment relationships. The broader bird species-environment relationship literature is comprised of many different study designs, data collection protocols, and analysis approaches. Individual studies vary widely in whether inference is supported by field-based …
Field sampling- this refers to any on-the-ground data collection, in the field, regardless of study design or sampling protocol. Field sampling is possible for environment- and bird-related variables. We view species-environment relationships constructed from field observations as empirical evidence. This does not indicate anything about the quality of this evidence, which must still be evaluated…
Remote sensing at an exact location- this refers to the assignment of values for a variable at a specific location when the measurement is based on analysis of imagery or any other sensor data, regardless of which method is used to translate sensor data into values. This evidence type refers primarily to environmental data (e.g., tree height, canopy cover). However remote sensing is sometimes use…
Data extraction from model-based maps- this refers to any method that assigns values to exact sampling locations using map-based estimate of environmental- or bird-related variable that were generated via extrapolation or interpolation of data collected from a sample of sites. Input data could include observations from any source (e.g., a network of weather stations, summary data from forest inve…
Future projection models- this refers to map-based values for environmental or bird-related data that originate as outputs from any type of future conditions projection model. The key characteristics of this evidence type is that initial model inputs, whether they come from field sampling, remote sensing, or model-based map inputs, are transformed into new values over time using a statistical or …
Expert opinion or synthesis- this refers to any presentation of environmental or bird-species related information that is not directly supported by empirical data from a primary study. Expert opinion can range from the opinion of one expert, to vote counting using a group of experts, to statistical techniques like structured decision modeling or Bayesian belief networks that can be used to transl…
Quantitative meta-analysis- this refers to any quantitative analyses of data from multiple primary sources to generate a pooled estimate for a species-environment relationships that may be more robust than those presented in single studies alone. This evidence type can be very useful for evaluating whether species-environment relationships presented in individual studies are broadly transferable …
Table 1. Matrix of common evidence types found across all literature reporting on species-environment relationships. The x axis relates to environmental predictor variables and the y axis refers to bird-related response variables. Each cell of the matrix indicates whether or not a particular evidence type satisfies inclusion-exclusion criteria for this systematic map. See article text for narrati…
